# Supplementary material for: Oxidation of HDAC4 by Nox4-derived H2O2 maintains tube formation by endothelial cells
Source: PubMed Central journal article supplement — Redox Biol. 2020 Aug 2;36:101669. doi: 10.1016/j.redox.2020.101669 (PMC7452117; doi:10.1016/j.redox.2020.101669), 2020-08-02
Supplement: mmc1.pdf [file mmc1.pdf]

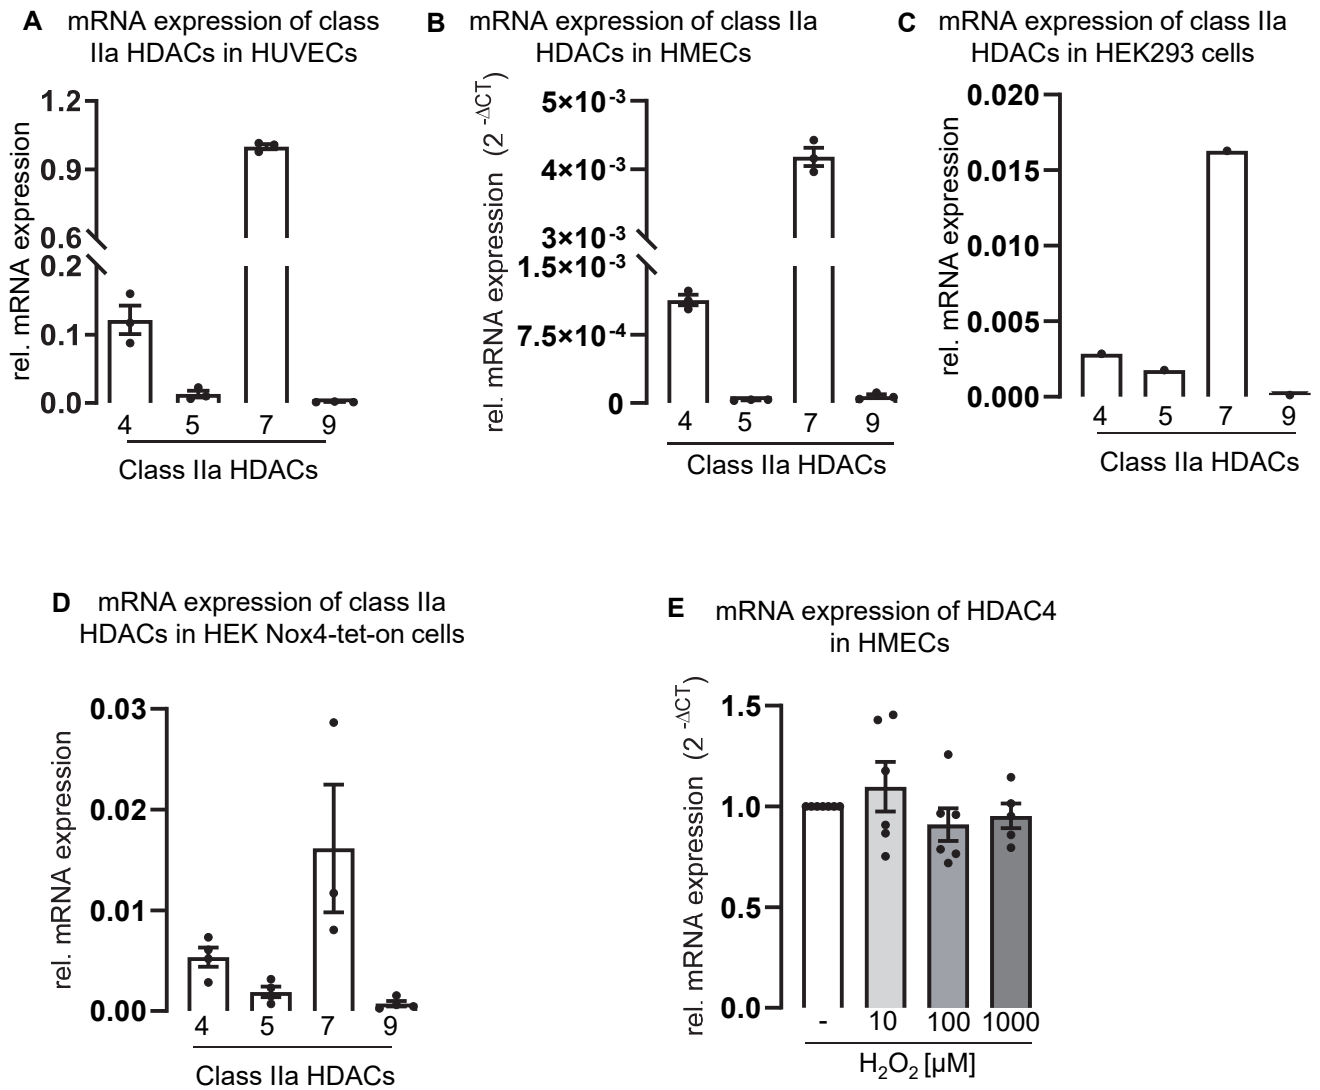

**Supplemental figure 1: Relative mRNA expression of class IIa HDACs** in HUVECs (n=3) (A), HMECs (n=3) (B), HEK293 (n=1) (C) and HEK293 Nox4-tet-on cells (n=3) (D) analyzed by qPCR. (E) HMECs were treated with H<sub>2</sub>O<sub>2</sub> (10/100/1000  $\mu$ M, 6 h). Relative mRNA expression of HDAC4 was determined by qPCR (n>5). All bar graphs show means  $\pm$  SEM.

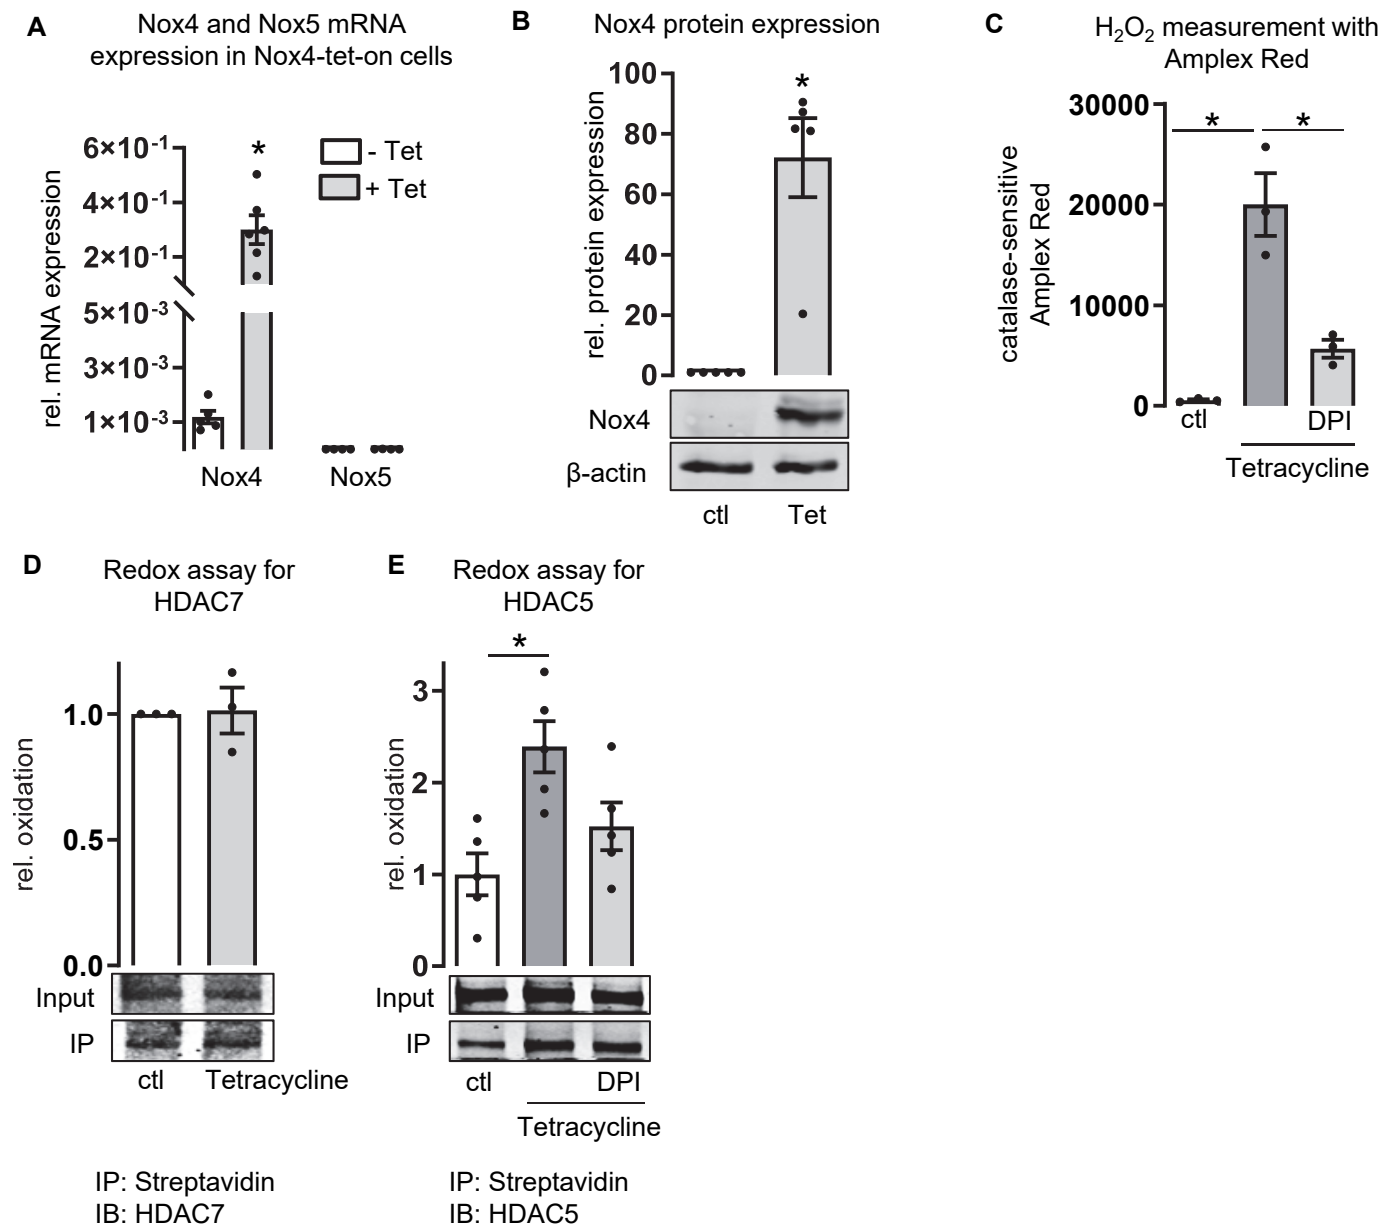

**Supplemental figure 2: Characterization of HET-tet-on cells.** (A) Analysis of Nox4 and Nox5 mRNA expression (n=6) and (B) Nox4 protein expression in Nox4 tet-on cells with and without tetracycline (Tet, 1 µg/ml, 24 h) induction by qPCR (n=5). mRNA and protein expression were normalized to β-actin (Unpaired t-test; One-sample t-test \*p<0.05). (C) Amplex Red assay. Catalase-sensitive H<sub>2</sub>O<sub>2</sub> measurement of tetracycline-inducible Nox4 overexpression in Nox4-tet-on cells with and without Tet (1 µg/ml, 24 h) and DPI (3 h, 3 µM). PEG-catalase (500 U/ml) was added before Amplex Red reagent (50 µM) (n=3) (One-way ANOVA with Tukey post-hoc test, \*p<0.05). All bar graphs show means ± SEM. (D+E) BIAM switch redox assays for HDAC7 (n=3) (D), HDAC5 (n=5) (E) in Nox4-tet-on cells with or without tetracycline (1 µg/ml, 24 h) and DPI (3 µM, 3 h). One representative Western blot is depicted. (One-way ANOVA with Tukey post-hoc test, \*p<0.05).

**A** Nox4 and 5 mRNA expression in HEK293-Nox5 cells

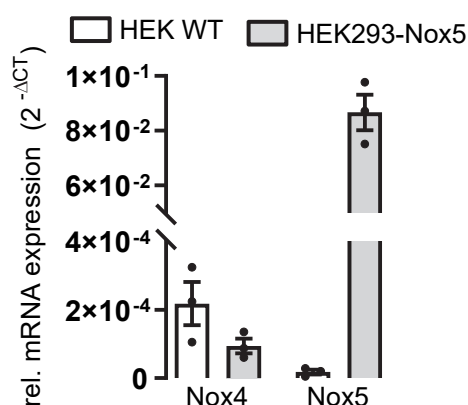

**B** Superoxide anion measurement with cytochrome c

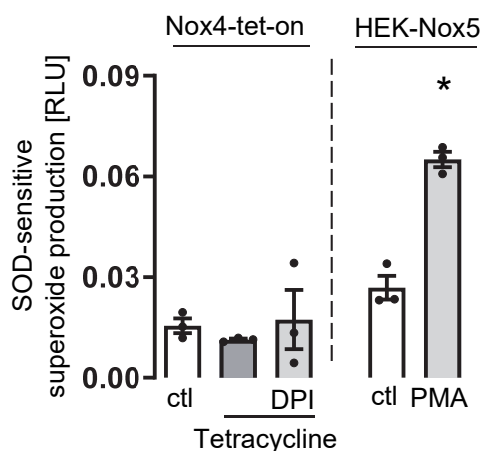

**C** Redox assay for Prx3

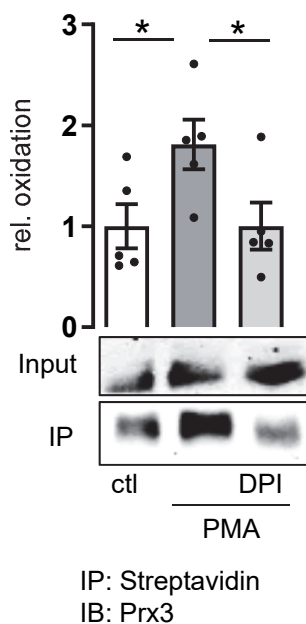

**D** Redox assays in HEK293-Nox5 cells

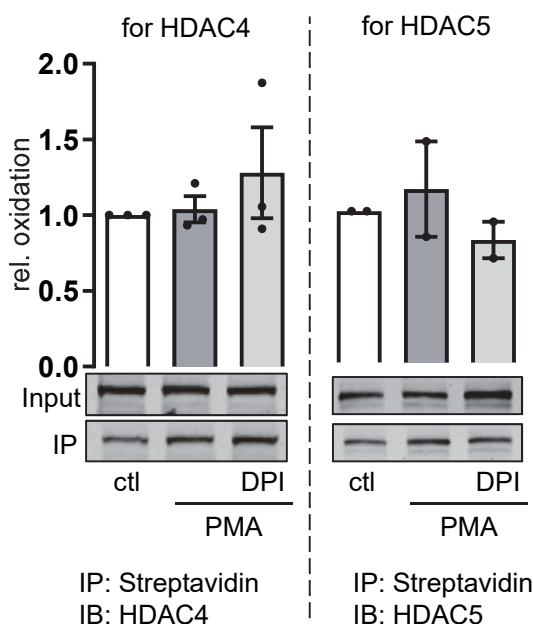

**Supplemental figure 3: Characterization of HEK-Nox5 cells.** (A) Analysis of Nox4 and Nox5 mRNA expression in HEK293 WT and HEK-Nox5 cells. mRNA levels were normalized to  $\beta$ -actin (n=3). (B) SOD-sensitive superoxide anion measurement in Nox4-tet-on cells or stably overexpressing HEK293-Nox5 cells. Nox4-tet-on cells were treated with or without tetracycline (1  $\mu$ g/ml, 24 h) and DPI (3  $\mu$ M, 3 h). Nox5 activation and superoxide production was induced by PMA (100 nM, 40 min) and detected with cytochrome c (20  $\mu$ M) (n=3) (Unpaired t-test, \*p<0.05). (C) BIAM switch assay in Nox5 overexpressing cells with or without PMA (100 nM, 40 min) and DPI (3  $\mu$ M, 3 h). Redox modification of peroxiredoxin (Prx) 3 (n=5) (One-way ANOVA with Tukey post-hoc test, \*p<0.05). (D+E) BIAM switch assays in Nox5 overexpressing cells with or without PMA (100 nM, 40 min) and DPI (3  $\mu$ M, 3 h). Redox modifications of HDAC4 (n=3) (D) and HDAC5 (n=2) (E) were analyzed. Representative Western blots are shown.

**A** BIAM Switch Redox Assay in HMECs

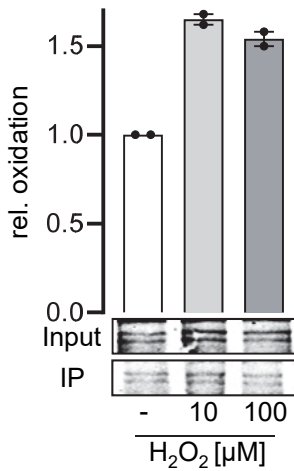

IP: Streptavidin  
IB: HDAC4

**B** HDAC4 expression in HMECs

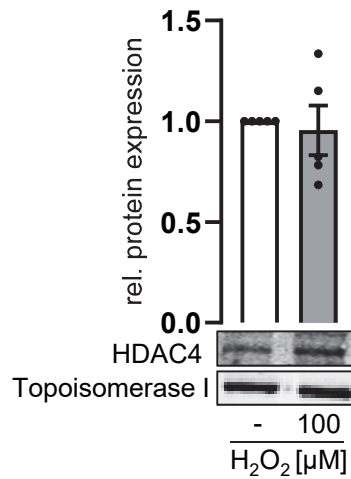

**C**

Nox4 vs. c-Jun, DLL4 and KLF2

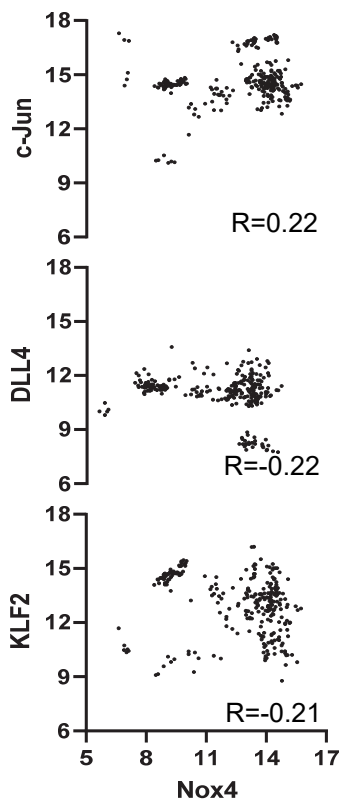

Nox4 vs. RhoB, SORBS2 and DEPP

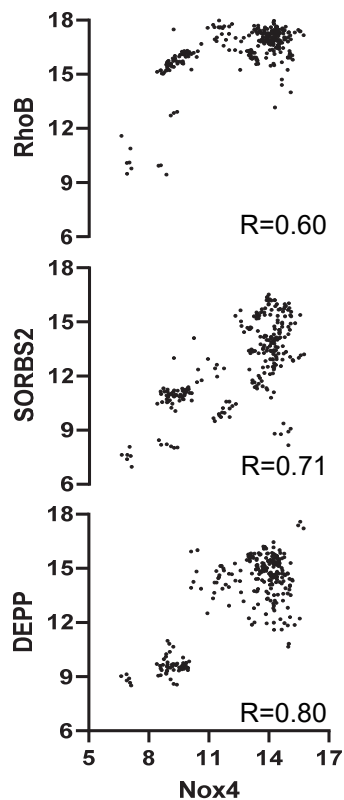

**Supplemental Figure 4:** (A) BIAM switch redox assay in HMECs stained for HDAC4. Cells were treated with or without H<sub>2</sub>O<sub>2</sub> (10/100 μM, 30 min) (n=2). (B) HMECs were treated with or without H<sub>2</sub>O<sub>2</sub> (100 μM, 6 h) and analyzed by Western blot (n=4). (C) GeneVestigator database was used to correlate Nox4 expression with Mef2A target gene expression in all datasets of endothelial cells which were available. Pearson coefficient (R) is shown for each correlation.

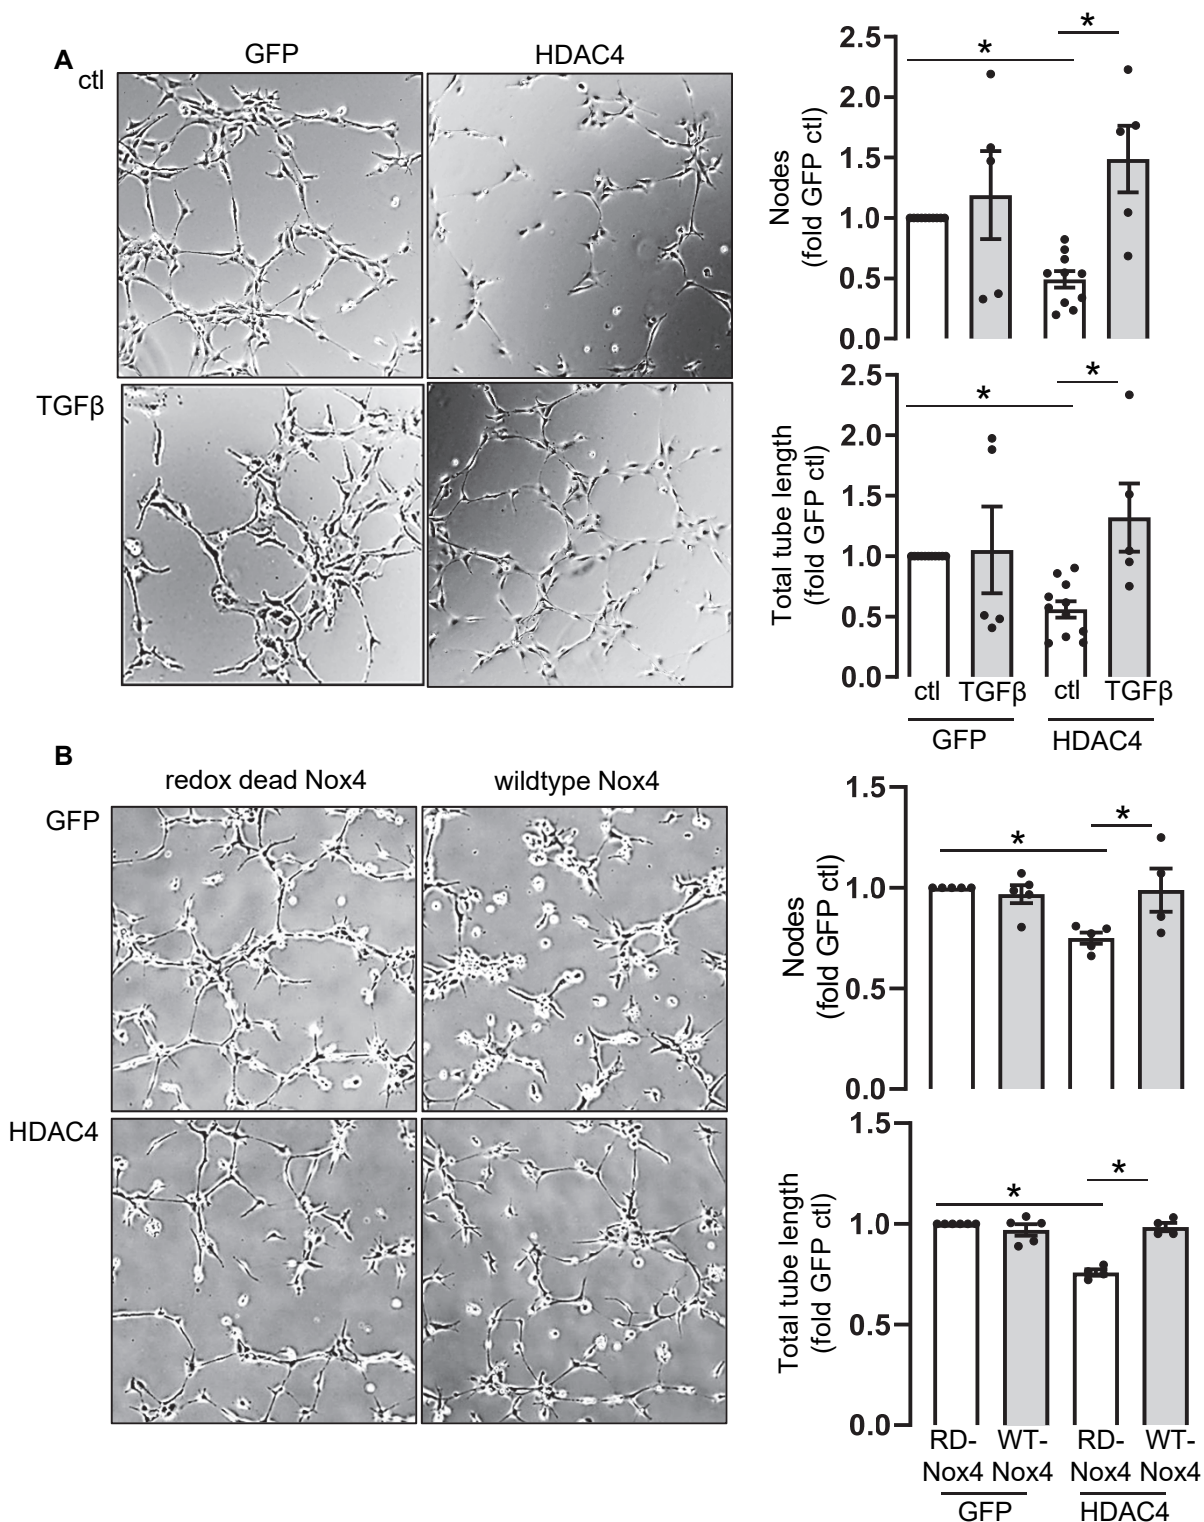

**Supplemental figure 4 : Tubeformation with co-overexpression of HDAC4 and Nox4** . Tube formation assay with HUVECs and HMECs. **(A)** HUVECs were transfected with HDAC4 by electroporation. After 24 h cells were treated with or without TGFβ (10 ng/ml) for 24 h and seeded on matrigel. **(B)** HMECs were transfected by lipofection with Lipofectamin3000 with RD- or WT-Nox4 and GFP or HDAC, respectively. Representative images after 4 h are shown. Numbers of nodes were counted and total tube length was measured with an image angiogenesis analyzer (Carpentier, 2012) in ImageJ after 4 h and summarized in the statistics (n≥4). All bar graphs show means ± SEM. (One-way ANOVA with Sidak post-hoc test, \*p≤0.05)
